# Supplementary material for: The Relationship between Angiogenic Factors and Energy Metabolism in Preeclampsia
Source: MDPI journal article supplement (doi:10.3390/nu14102172), 2022-05-23
Supplement: s1 [file s1]

**Table S1.** Maternal, obstetric and perinatal results: EOPE vs. LOPE.

| <b>MATERNAL RESULTS</b>                                       | <b>EOPE<br/>n = 11</b> | <b>LOPE<br/>n = 15</b> | <b>p value</b> |
|---------------------------------------------------------------|------------------------|------------------------|----------------|
| Maternal age (years)                                          | 33.4 ± 7.1             | 35.4 ± 2.7             | 0.380          |
| Ethnic Group:                                                 |                        |                        | 0.565          |
| • Caucasian                                                   | 7 [63.6%]              | 7 [58.3%]              |                |
| • Hispanic                                                    | 4 [36.4%]              | 4 [33.3%]              |                |
| • Asian                                                       | 0                      | 1 [8.3%]               |                |
| Pregravid body mass index (kg/m2)                             | 22.2 ± 3.2             | 24.8 ± 3.8             | 0.125          |
| Body mass index classification:                               |                        |                        |                |
| • Underweight (< 18.4)                                        | 1 [12.5%]              | 0                      | 0.276          |
| • Normal weight (18.5-24.9)                                   | 5 [62.5%]              | 7 [58.3%]              | 0.052          |
| • Overweight (25.0-29.9)                                      | 2 [25.0%]              | 4 [33.3%]              | 0.166          |
| • Obesity (> 30.0)                                            | 0                      | 1 [8.3%]               | 0.276          |
| Gestational weight gain (kg)                                  | 9.0 (4.0)              | 14.0 (10.00)           | 0.017*         |
| <b>OBSTETRIC RESULTS</b>                                      |                        |                        |                |
| Gestational age at study (weeks)                              | 34.0 (3.0)             | 37.0 (1.0)             | 0.000211*      |
| Parity:                                                       |                        |                        |                |
| • Primigravid                                                 | 6 [54.5%]              | 7 [46.7%]              | 0.580          |
| • Multiparous                                                 | 2 [18.2%]              | 3 [20.0%]              | 0.640          |
| • Previous C-section                                          | 2 [18.2%]              | 3 [20.0%]              | 0.585          |
| • Previous miscarriage                                        | 1 [9.0%]               | 6 [40.0%]              | 0.230          |
| Mode of pregnancy:                                            |                        |                        | 0.531          |
| • Spontaneous                                                 | 8 [72.8%]              | 10 [76.9%]             |                |
| • ART (IUI)                                                   | 0                      | 0                      |                |
| • ART (IVF)                                                   | 2 [18.2%]              | 3 [23.1%]              |                |
| Twin pregnancy                                                | 2 [18.2%]              | 4 [26.7%]              | 0.003*         |
| Obstetric reason for caesarean section:                       |                        |                        |                |
| A.- Fetal:                                                    |                        |                        | 0.227          |
| • Breech or transverse fetal position                         | 1 [9.1%]               | 1 [7.1%]               |                |
| • Suspicion of fetal macrosomia                               | 0                      | 0                      |                |
| • Intrapartum fetal distress                                  | 1 [9.1%]               | 1 [7.1%]               |                |
| B.- Maternal:                                                 |                        |                        | 0.366          |
| • Preeclampsia                                                | 9 [81.8%]              | 8 [57.1%]              |                |
| • Iterative C-section or Previous C-section + Bishop test ≤ 6 | 0                      | 0                      |                |
| • Twin pregnancy + Bishop test ≤ 6                            | 0                      | 0                      |                |
| • Labor dystocia                                              | 0                      | 3 [21.4%]              |                |
| • Elective                                                    | 0                      | 0                      |                |
| • Fracture of femur head                                      | 0                      | 0                      |                |
| • Myopia magna                                                | 0                      | 1 [7.1%]               |                |
| <b>PERINATAL RESULTS</b>                                      |                        |                        |                |
| EFW (g)                                                       | 1307.9 ± 500.1         | 2322.2 ± 556.3         | 0.000068*      |
| Centile EFW                                                   | 9.5 ± 16.9             | 54.1 ± 40.8            | 0.001*         |
| Fetal growth restriction:                                     |                        |                        |                |
| • SGA                                                         | 3 [27.3%]              | 0                      | 0.124          |
| • IUGR                                                        | 8 [72.7%]              | 3 [20.0%]              | 0.354          |
| Neonatal birth weight (g)                                     | 1334.4 ± 533.2         | 2582.5 ± 728.1         | 0.000045*      |
| Neonatal birth centile weight                                 | 1.7 ± 2.2              | 52.2 ± 37.8            | 0.000004*      |
| Neonatal sex:                                                 |                        |                        | 0.075          |
| • Male                                                        | 2 [15.4%]              | 9 [50.0%]              |                |
| • Female                                                      | 11 [84.6%]             | 9 [50.0%]              |                |

|                              |               |               |        |
|------------------------------|---------------|---------------|--------|
| Umbilical artery pH at birth | 7.29 ± 0.06   | 7.28 ± 0.06   | 0.675  |
| Placental weight             | 295.7 ± 107.9 | 472.5 ± 135.9 | 0.001* |

*Key:* EOPE: early-onset preeclampsia, LOPE: late-onset preeclampsia, C-section: caesarean section, ART: assisted reproductive technology, IUI: intrauterine insemination, IVF: in vitro fertilization, EFW: estimated fetal weight, SGA: small for gestational age, IUGR: intrauterine growth restriction. The results of qualitative variables are represented as absolute values and percentages, n [%]. The results of quantitative variables are expressed as mean ± standard deviation, or as the median and interquartile range (in brackets) according to the distribution of the variable. \* The difference was significant compared to both groups ( $p < 0.05$ ).
